# Supplementary material
Source: MDPI journal article supplement (https://www.mdpi.com/2077-0472/12/1/106)
Supplement: s1 [file s1]

## Supplementary materials for Agriculture: **Impact of Inorganic Metal (Ag, Cu) Nanoparticles on the Quality of Seeds and Dried of Rapeseed Sprouts**

**Magdalena Kachel, Stanisław Rudy, Marta Krajewska and Mariusz Rudy**

Changes in the reduced water content (MR) in the function of sublimation drying duration are presented in Figure S1. The fluctuations of (MR) relative to the drying duration did not vary significantly between material obtained in the respective years; spraying with nanoparticles also did not have an impact on the drying kinetics. Based on the obtained results, it can be concluded that with increasing temperature, the required duration of sublimation drying for rape sprouts was decreased. An increase in the temperature of the heating plates from 20°C to 40°C reduced the drying time by approximately 34%, whereas at 60°C, the same was approx. 48% lower compared to the drying time recorded at 20°C.

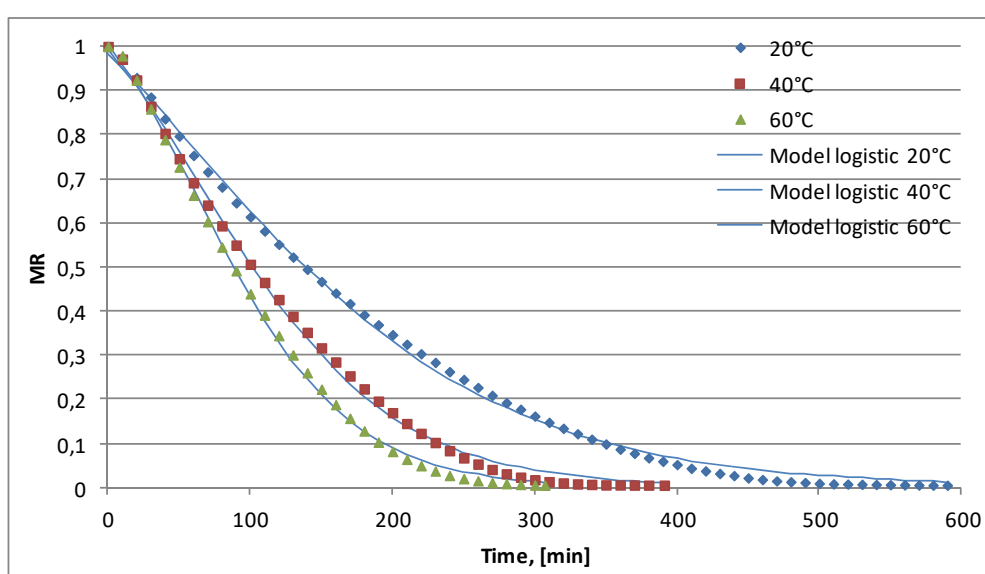

**Figure S1.** Drying curves of freeze-drying rape sprouts

The results of regression analysis in terms of the six analyzed models representing the kinetics of sublimation, vacuum, and convection drying kinetics are presented in Table S1. Based on the obtained values, it can be concluded that for each of the analyzed models, with the three temperature levels explored, a good fit of the experimental data was achieved. The coefficient of determination ( $R^2$ ) for the

equations was between 0.958 and 0.999. The root mean squared error (*RMSE*) and chi-squared test ( $\chi^2$ ) values remained low, oscillating within the ranges of 0.0109-0.0666 and 0.0001-0.0046. The best fit between the analyzed models and experimental data was recorded for the Logistic model with the heating plates temperature of 20°C and 60°C ( $R^2$ - above 0.998, *RMSE*- below 0.0136), whereas at 40°C, better fit was observed when using the Wang and Singh model [1]. In order to normalize the results, due to small differences in the fit of experimental data between the two models, the Logistic model was used in Figure S1. A very good fit of experimental data was also observed in the case of the Page and Logarithmic model. The highest values of experimental data fit using the Logistic model were reported for the processes of drying rice [2] and bamboo [3].

The statistical analysis of models describing kinetics of freeze-drying of rape sprouts is presented in Table S14. The values of coefficients relevant to the six analyzed regression equations are presented in Table S15.

**Table S1.** Equations applied to the drying curves

| Model number | Model name          | Model equation                                         | References                 |
|--------------|---------------------|--------------------------------------------------------|----------------------------|
| 1            | Newton              | $MR = \exp(-k \cdot \tau)$                             | Demir et al. (2004)        |
| 2            | Page                | $MR = \exp(-k \cdot \tau^n)$                           | Sarimeseli (2011)          |
| 3            | Henderson and Pabis | $MR = a \cdot \exp(-k \cdot \tau)$                     | Henderson and Pabis (1961) |
| 4            | Logarithmic         | $MR = a \cdot \exp(-k \cdot \tau) + b$                 | Sarimeseli (2011)          |
| 5            | Wang and Singh      | $MR = 1 + a \cdot \tau + b \cdot \tau^2$               | Wang and Singh (1978)      |
| 6            | Logistic            | $MR = b \cdot ((1 + a \cdot \exp(k \cdot \tau))^{-1})$ | Soysal et al. (2006)       |

$k, k_i$  – drying coefficients [ $\text{min}^{-1}$ ];  $a, b$  – coefficients of the equations;  $n$  – exponent;  $\tau$  – time [min]

A three-way analysis of variance (ANOVA) was presented to determine the effect of metal nanoparticles addition, freeze-drying temperature and the year of rapeseed cultivation on fat, protein, flavonoids and total polyphenolic content (Table S2, S3, S4, S5). The lightness, chroma and hue were also determined (Table S6, S7, S8). Moreover, a two-way analysis of variance (ANOVA) was presented to determine the effect of metal nanoparticles addition and the year of rapeseed cultivation on fat, flavonoids and glucosinolates content, protein and thousand seed weight (Table S9, S10, S11, S12, S13).

**Table S2.** Three-way analysis of variance (ANOVA)- content of fat in dried rape sprouts

| Effect         | SS    | df | MS   | F           | p value |
|----------------|-------|----|------|-------------|---------|
| Var1           | 73,4  | 4  | 18,4 | 92839,9299  | 0,00    |
| Var2           | 49,8  | 2  | 24,9 | 126023,4121 | 0,00    |
| Var3           | 103,5 | 2  | 51,7 | 261676,5279 | 0,00    |
| Var1*Var2      | 19,3  | 8  | 2,4  | 12212,91235 | 0,00    |
| Var1*Var3      | 61,5  | 8  | 7,7  | 38846,27896 | 0,00    |
| Var2*Var3      | 11,5  | 4  | 2,9  | 14490,41852 | 0,00    |
| Var1*Var2*Var3 | 28,8  | 16 | 1,8  | 9092,483617 | 0,00    |
| Error          | 0,0   | 90 | 0,0  |             |         |

Var1- metal nanoparticles, Var2-drying temperature, Var3-year, SS-sum of squares, df- degrees of freedom, MS- mean square

**Table S3.** Three-way analysis of variance (ANOVA)- content of protein in dried rape sprouts

| Effect         | SS     | df | MS    | F     | p value |
|----------------|--------|----|-------|-------|---------|
| Var1           | 106,97 | 4  | 26,74 | 25762 | 0,00    |
| Var2           | 24,91  | 2  | 12,45 | 11998 | 0,00    |
| Var3           | 119,53 | 2  | 59,76 | 57573 | 0,00    |
| Var1*Var2      | 7,07   | 8  | 0,88  | 851   | 0,00    |
| Var1*Var3      | 111,27 | 8  | 13,91 | 13399 | 0,00    |
| Var2*Var3      | 21,41  | 4  | 5,35  | 5156  | 0,00    |
| Var1*Var2*Var3 | 16,86  | 16 | 1,05  | 1015  | 0,00    |
| Error          | 0,09   | 90 | 0,00  |       |         |

Var1- metal nanoparticles, Var2-drying temperature, Var3-year, SS-sum of squares, df- degrees of freedom, MS- mean square

**Table S4.** Three-way analysis of variance (ANOVA)- content of flavonoids in dried rape sprouts

| Effect    | SS   | df | MS   | F    | p value |
|-----------|------|----|------|------|---------|
| Var1      | 4120 | 4  | 1030 | 1738 | 0,00    |
| Var2      | 245  | 2  | 122  | 207  | 0,00    |
| Var3      | 8648 | 2  | 4324 | 7297 | 0,00    |
| Var1*Var2 | 1584 | 8  | 198  | 334  | 0,00    |
| Var1*Var3 | 930  | 8  | 116  | 196  | 0,00    |
| Var2*Var3 | 512  | 4  | 128  | 216  | 0,00    |

|                |      |     |     |     |      |
|----------------|------|-----|-----|-----|------|
| Var1*Var2*Var3 | 2888 | 16  | 181 | 305 | 0,00 |
| Error          | 107  | 180 | 1   |     |      |

Var1- metal nanoparticles, Var2-drying temperature, Var3-year, SS-sum of squares, df- degrees of freedom, MS- mean square

**Table S5.** Three-way analysis of variance (ANOVA)- content of total polyphenols in dried rape sprouts

| Effect         | SS     | df  | MS    | F      | p value  |
|----------------|--------|-----|-------|--------|----------|
| Var1           | 0,61   | 4   | 0,15  | 2,6    | 0,036741 |
| Var2           | 194,42 | 2   | 97,21 | 1674,3 | 0,000000 |
| Var3           | 153,70 | 2   | 76,85 | 1323,6 | 0,000000 |
| Var1*Var2      | 2,13   | 8   | 0,27  | 4,6    | 0,000041 |
| Var1*Var3      | 1,48   | 8   | 0,18  | 3,2    | 0,002153 |
| Var2*Var3      | 1,67   | 4   | 0,42  | 7,2    | 0,000022 |
| Var1*Var2*Var3 | 3,00   | 16  | 0,19  | 3,2    | 0,000065 |
| Error          | 10,45  | 180 | 0,06  |        |          |

Var1- metal nanoparticles, Var2-drying temperature, Var3-year, SS-sum of squares, df- degrees of freedom, MS- mean square

**Table S6.** Three-way analysis of variance (ANOVA)- values of the L\* color coordinate for dried rape sprouts

| Effect         | SS     | df  | MS     | F    | p value |
|----------------|--------|-----|--------|------|---------|
| Var1           | 58,8   | 4   | 14,7   | 70   | 0,00    |
| Var2           | 372,2  | 2   | 186,1  | 888  | 0,00    |
| Var3           | 2410,6 | 2   | 1205,3 | 5749 | 0,00    |
| Var1*Var2      | 55,8   | 8   | 7,0    | 33   | 0,00    |
| Var1*Var3      | 66,5   | 8   | 8,3    | 40   | 0,00    |
| Var2*Var3      | 54,6   | 4   | 13,7   | 65   | 0,00    |
| Var1*Var2*Var3 | 122,1  | 16  | 7,6    | 36   | 0,00    |
| Error          | 37,7   | 180 | 0,2    |      |         |

Var1- metal nanoparticles, Var2-drying temperature, Var3-year, SS-sum of squares, df- degrees of freedom, MS- mean square

**Table S7.** Three-way analysis of variance (ANOVA)- saturation of the dried rape sprouts

| Effect         | SS    | df  | MS    | F   | p value  |
|----------------|-------|-----|-------|-----|----------|
| Var1           | 10,8  | 4   | 2,7   | 15  | 0,000000 |
| Var2           | 138,2 | 2   | 69,1  | 382 | 0,000000 |
| Var3           | 274,6 | 2   | 137,3 | 760 | 0,000000 |
| Var1*Var2      | 55,1  | 8   | 6,9   | 38  | 0,000000 |
| Var1*Var3      | 52,7  | 8   | 6,6   | 36  | 0,000000 |
| Var2*Var3      | 67,0  | 4   | 16,8  | 93  | 0,000000 |
| Var1*Var2*Var3 | 59,2  | 16  | 3,7   | 20  | 0,000000 |
| Error          | 32,5  | 180 | 0,2   |     |          |

Var1- metal nanoparticles, Var2-drying temperature, Var3-year, SS-sum of squares, df- degrees of freedom, MS- mean square

**Table S8.** Three-way analysis of variance (ANOVA)- hue of the dried rape sprouts

| Effect         | SS  | df  | MS  | F   | p value  |
|----------------|-----|-----|-----|-----|----------|
| Var1           | 15  | 4   | 4   | 9   | 0,000001 |
| Var2           | 92  | 2   | 46  | 109 | 0,000000 |
| Var3           | 759 | 2   | 380 | 901 | 0,000000 |
| Var1*Var2      | 63  | 8   | 8   | 19  | 0,000000 |
| Var1*Var3      | 21  | 8   | 3   | 6   | 0,000000 |
| Var2* Var3     | 594 | 4   | 148 | 352 | 0,000000 |
| Var1*Var2*Var3 | 63  | 16  | 4   | 9   | 0,000000 |
| Error          | 76  | 180 | 0   |     |          |

Var1- metal nanoparticles, Var2-drying temperature, Var3-year, SS-sum of squares, df- degrees of freedom, MS- mean square

**Table S9.** Two-way analysis of variance (ANOVA)- content of fat in rapeseeds

| Effect    | SS    | df | MS    | F   | p value  |
|-----------|-------|----|-------|-----|----------|
| Var1      | 17,43 | 4  | 4,36  | 50  | 0,000000 |
| Var2      | 86,14 | 2  | 43,07 | 496 | 0,000000 |
| Var1*Var2 | 17,34 | 8  | 2,17  | 25  | 0,000000 |
| Error     | 2,61  | 60 | 0,09  |     |          |

Var1- metal nanoparticles, Var2-year, SS-sum of squares, df- degrees of freedom, MS- mean square

**Table S10.** Two-way analysis of variance (ANOVA)- content of protein in rapeseeds

| Effect    | SS   | df | MS   | F    | p value  |
|-----------|------|----|------|------|----------|
| Var1      | 7,29 | 4  | 1,82 | 20,3 | 0,000000 |
| Var2      | 0,26 | 2  | 0,13 | 1,4  | 0,256150 |
| Var1*Var2 | 0,15 | 8  | 0,02 | 0,2  | 0,987372 |
| Error     | 2,69 | 60 | 0,09 |      |          |

Var1- metal nanoparticles, Var2-year, SS-sum of squares, df- degrees of freedom, MS- mean square

**Table S11.** Two-way analysis of variance (ANOVA)- mass of one thousand seeds

| Effect    | SS     | df | MS    | F     | p value  |
|-----------|--------|----|-------|-------|----------|
| Var1      | 0,835  | 4  | 0,209 | 2,63  | 0,054219 |
| Var2      | 14,059 | 2  | 7,029 | 88,36 | 0,000000 |
| Var1*Var2 | 1,218  | 8  | 0,152 | 1,91  | 0,094691 |
| Error     | 2,387  | 60 | 0,080 |       |          |

Var1- metal nanoparticles, Var2-year, SS-sum of squares, df- degrees of freedom, MS- mean square

**Table S12.** Two-way analysis of variance (ANOVA)- content of flavonoids in rapeseeds

| Effect | SS     | df | MS    | F     | p value |
|--------|--------|----|-------|-------|---------|
| Var1   | 19,729 | 4  | 4,932 | 810,9 | 0,00    |
| Var2   | 10,458 | 2  | 5,229 | 859,7 | 0,00    |

|           |       |    |       |      |      |
|-----------|-------|----|-------|------|------|
| Var1*Var2 | 2,197 | 8  | 0,275 | 45,1 | 0,00 |
| Error     | 0,365 | 60 | 0,006 |      |      |

Var1- metal nanoparticles, Var2-year, SS-sum of squares, df- degrees of freedom, MS- mean square

**Table S13.** Two-way analysis of variance (ANOVA)- content of glucosinolates in rapeseeds

| Effect    | SS     | df | MS    | F      | p value |
|-----------|--------|----|-------|--------|---------|
| Var1      | 68,24  | 4  | 17,06 | 657,9  | 0,00    |
| Var2      | 61,06  | 2  | 30,53 | 1177,4 | 0,00    |
| Var1*Var2 | 113,33 | 8  | 14,17 | 546,4  | 0,00    |
| Error     | 1,56   | 60 | 0,03  |        |         |

Var1- metal nanoparticles, Var2-year, SS-sum of squares, df- degrees of freedom, MS- mean square

**Table S14.** Statistical analysis of models describing kinetics of freeze-drying of rape sprouts

| Model               | Temperature |        |          |       |        |          |       |        |          |
|---------------------|-------------|--------|----------|-------|--------|----------|-------|--------|----------|
|                     | 20°C        |        |          | 40°C  |        |          | 60°C  |        |          |
|                     | $R^2$       | RMSE   | $\chi^2$ | $R^2$ | RMSE   | $\chi^2$ | $R^2$ | RMSE   | $\chi^2$ |
| Newton              | 0.983       | 0.0391 | 0.0016   | 0.969 | 0.0559 | 0.0032   | 0.958 | 0.0666 | 0.0046   |
| Page                | 0.997       | 0.0159 | 0.0003   | 0.998 | 0.0155 | 0.0003   | 0.999 | 0.0112 | 0.0001   |
| Henderson and Pabis | 0.988       | 0.0322 | 0.0011   | 0.980 | 0.0443 | 0.0021   | 0.975 | 0.0516 | 0.0028   |
| Logarithmic         | 0.998       | 0.0142 | 0.0002   | 0.995 | 0.0232 | 0.0006   | 0.993 | 0.028  | 0.0009   |
| Wang and Singh      | 0.998       | 0.0139 | 0.0002   | 0.999 | 0.0109 | 0.0001   | 0.995 | 0.0224 | 0.0005   |
| Logistic            | 0.998       | 0.0136 | 0.0002   | 0.998 | 0.0142 | 0.0002   | 0.999 | 0.0109 | 0.0001   |

**Table S15.** Coefficient values in the models describing the freeze-drying of rape sprouts

| Temperature | Equation            | Coefficient |          |          |           |
|-------------|---------------------|-------------|----------|----------|-----------|
|             |                     | $a$         | $k$      | $n$      | $b$       |
| 20°C        | Newton              |             | 0,005704 |          |           |
|             | Page                |             | 0.001488 | 1.250076 |           |
|             | Henderson and Pabis | 1.077338    | 0.006117 |          |           |
|             | Logarithmic         | 1.129226    | 0.004822 |          | -0.093288 |
|             | Wang and Singh      | -0.004040   |          |          | 0.000004  |
|             | Logistic            | 1.614376    | 0.009009 |          | 0.637043  |
| 40°C        | Newton              |             | 0.008089 |          |           |
|             | Page                |             | 0.001120 | 1.395127 |           |
|             | Henderson and Pabis | 1.112402    | 0.008922 |          |           |
|             | Logarithmic         | 1.195532    | 0.006601 |          | -0.131315 |
|             | Wang and Singh      | -0.005798   |          |          | 0.000008  |
|             | Logistic            | 1.374321    | 0.014981 |          | 0.379438  |

|      |                     |           |          |           |
|------|---------------------|-----------|----------|-----------|
| 60°C | Newton              |           | 0.009425 |           |
|      | Page                |           | 0.000845 | 1.497865  |
|      | Henderson and Pabis | 1.133285  | 0.010573 |           |
|      | Logarithmic         | 1.250857  | 0.007397 | -0.170288 |
|      | Wang and Singh      | -0.006813 |          | 0.000012  |
|      | Logistic            | 1.300039  | 0.019196 | 0.290959  |

$k$  – drying coefficients [ $\text{min}^{-1}$ ];  $a$ ,  $b$  – coefficients of the equations;  $n$  – exponent.

## References

1. Wang, C.Y.; Singh, R.P. Use of variable equilibrium moisture content in modeling rice drying. *Trans. ASAE* **1978**, *11*, 668–672.
2. Cihan, A.; Kahveci, K.; Hacıhafızoğlu, O. Modelling of intermittent drying of thin layer rough rice. *J. Food Eng.* **2007**, *79*, 293–298. <https://doi.org/10.1016/j.jfoodeng.2006.01.057>.
3. Bal, L.M.; Kar, A.; Satya, S.; Naik, S.N. Drying kinetics and effective moisture diffusivity of bamboo shoot slices undergoing microwave drying. *Int. J. Food Sci. Technol.* **2010**, *45*, 2321–2328. <https://doi.org/10.1111/j.1365-2621.2010.02402.x>.
